# Supplementary material
Source: MDPI journal article supplement (https://www.mdpi.com/2674-0494/3/2/7)
Supplement: s1 [file s1]

# Supplementary Material: Tropical and Subtropical South American Intraseasonal Variability: A Normal-Mode Approach

André S. W. Teruya, Victor C. Mayta, Breno Raphaldini, Pedro L. Silva Dias,  
Camila R. Sapucci

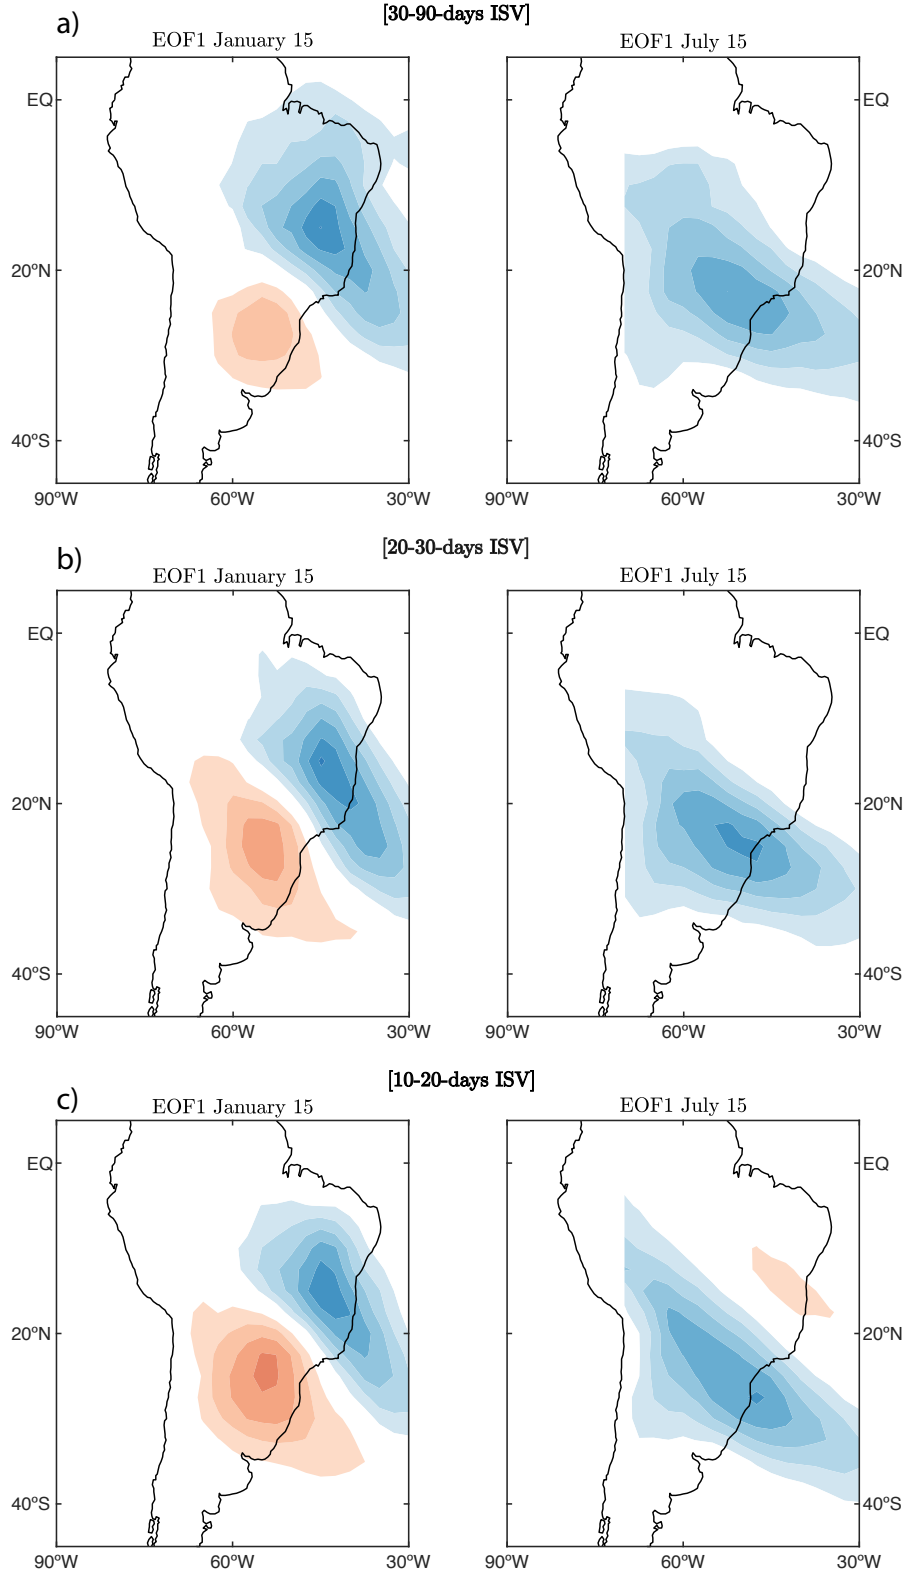

Figure S1: Spatial patterns of OLR for (a) 30-90-days ISV, (b) 20-30-days ISV, and (a) 10-30-days ISV and on 15 January (left panels) and 15 July (right panels).

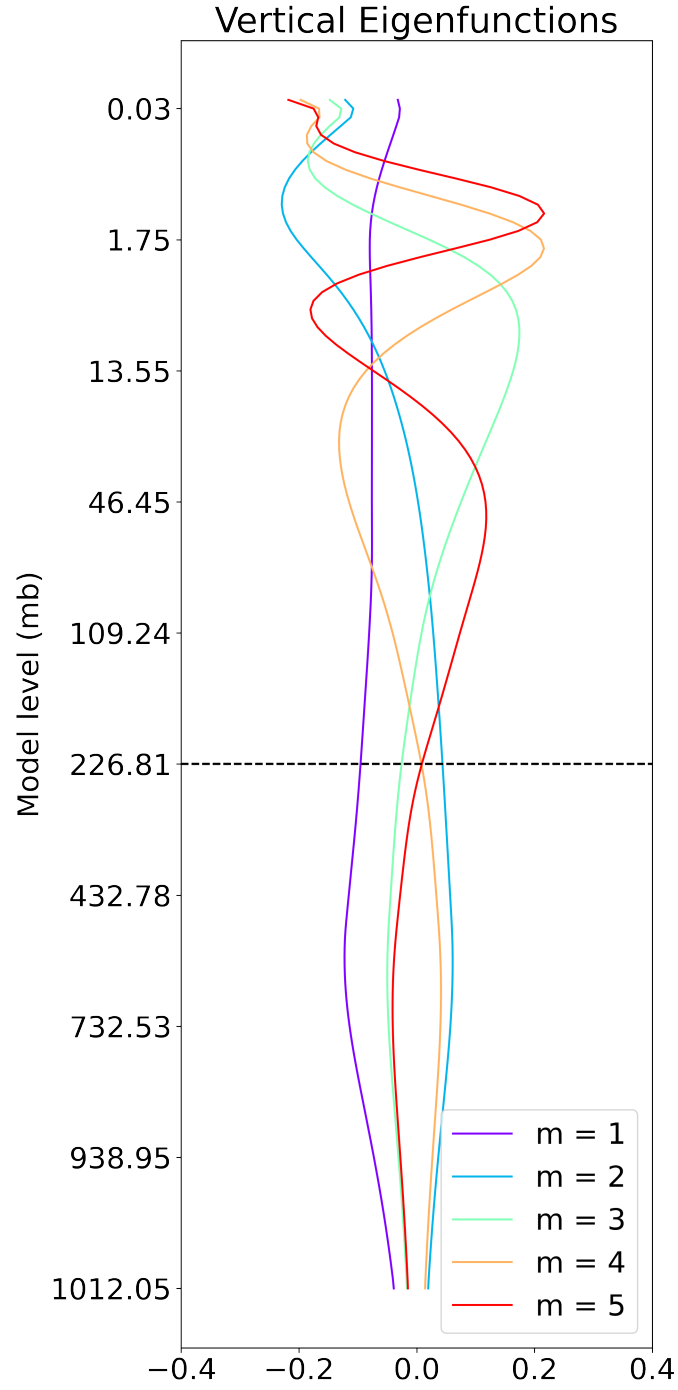

Figure S2: Nondimensional eigenfunctions with vertical modes 5 to 9.
